# Supplementary material for: Correlation Between Immune Lymphoid Cells and Plasmacytoid Dendritic Cells in Human Colon Cancer
Source: PubMed Central journal article supplement (PMC7940519; doi:10.3389/fimmu.2021.601611), 2021-02-23
Supplement: DataSheet_1.pdf [file DataSheet_1.pdf]

Supplementary Figures and Tables

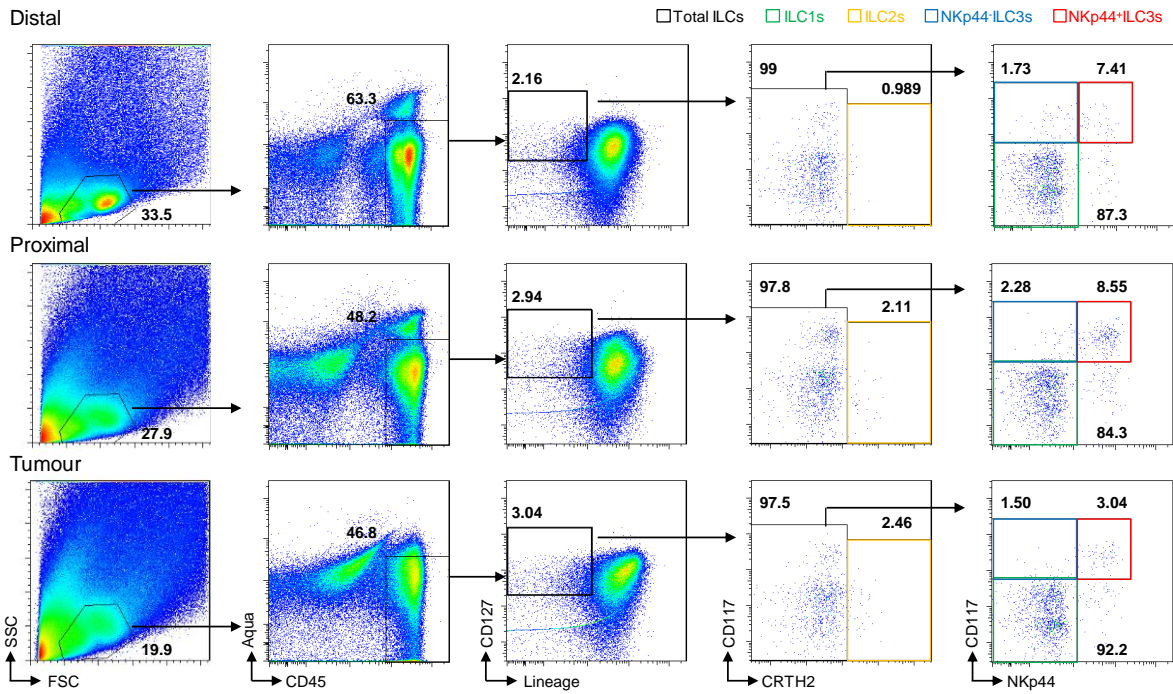

**Supplementary Figure 1.** Gating ILCs subtypes from tumour, proximal, and distal regions of patients with colon cancer.

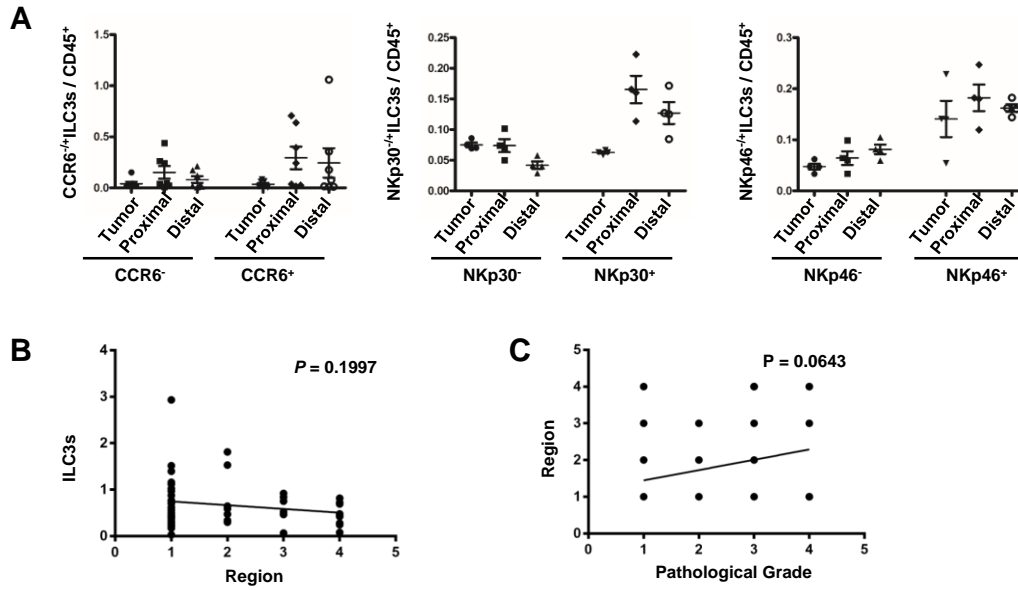

**Supplementary Figure 2.** (A) The percentage of other ILC3 subtypes among CD45<sup>+</sup> cells in colon cancer tissues, including CCR6<sup>+/-</sup>, NKp30<sup>+/-</sup>, and NKp46<sup>+/-</sup> ILC3s. (B) The correlation between the percentage of ILC3s in tumor (T) versus distal (D) tissue specimens and the region of the tumor in the colon: 1, 2, 3, and 4 represent the ascending, transverse, descending, and sigmoid colon, respectively. (C) Correlation between the pathological stage and tumor region in the colon.

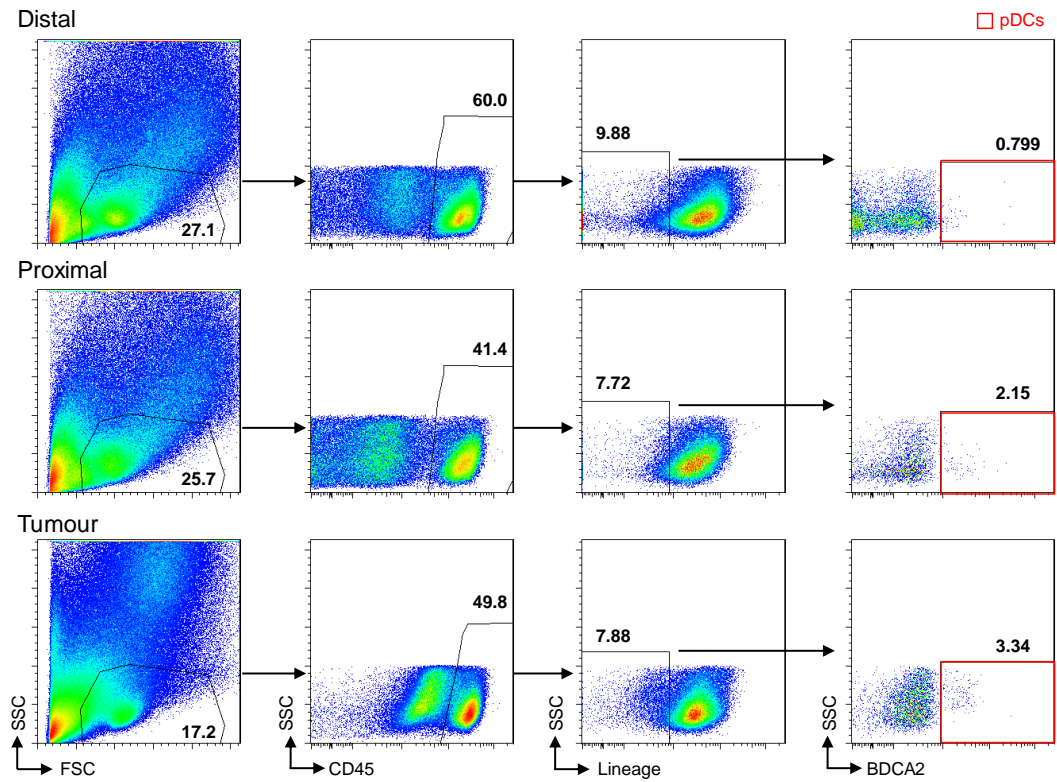

**Supplementary Figure 3.** Gating pDCs from tumour, proximal, and distal regions of patients with colon cancer.

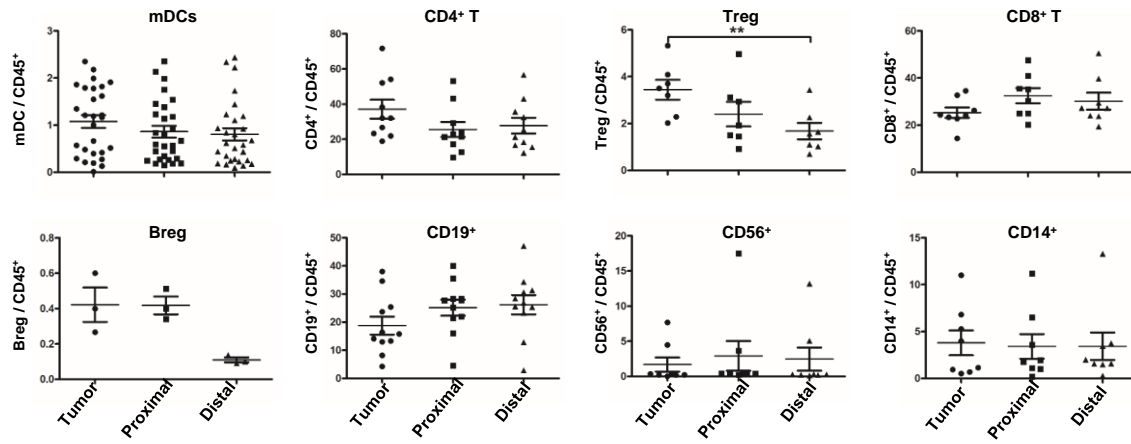

**Supplementary Figure 4.** Percentage of mDCs, CD4<sup>+</sup> T, CD8<sup>+</sup> T, Treg, Breg, B, NK, and monocyte cells among CD45<sup>+</sup> cells in colon cancer tissues. A paired *t*-test was used for statistical comparisons. **\*\**P* < 0.01.**

**Table S1. Clean read quality metrics**

| Sample   | Total clean reads (M) | Clean reads Q20 (%) | Clean reads ratio (%) |
|----------|-----------------------|---------------------|-----------------------|
| D_ILC3_1 | 60.41                 | 99.25               | 80.03                 |
| D_ILC3_2 | 61.37                 | 98.48               | 91.40                 |
| D_ILC3_3 | 60.46                 | 98.44               | 80.50                 |
| D_ILC3_4 | 61.07                 | 99.17               | 83.12                 |
| T_ILC3_1 | 60.59                 | 99.15               | 73.89                 |
| T_ILC3_2 | 60.81                 | 98.41               | 84.36                 |
| T_ILC3_3 | 60.70                 | 99.01               | 86.46                 |
| T_ILC3_4 | 60.69                 | 99.19               | 80.81                 |

**Table S2. Clean read quality metrics**

| Sample  | Total clean reads (M) | Clean reads Q20 (%) | Clean reads ratio (%) |
|---------|-----------------------|---------------------|-----------------------|
| D_pDC_2 | 60.84                 | 97.98               | 88.42                 |
| D_pDC_3 | 61.04                 | 98.23               | 83.08                 |
| D_pDC_4 | 61.28                 | 99.27               | 81.59                 |
| T_pDC_2 | 61.18                 | 98.80               | 79.72                 |
| T_pDC_3 | 60.59                 | 99.08               | 75.74                 |
| T_pDC_4 | 60.58                 | 98.60               | 77.30                 |
